# Supplementary material
Source: PubMed Central journal article supplement (PMC3048898)
Supplement: NIHMS241286-supplement-Supp_Fig_S1.pdf [file NIHMS241286-supplement-Supp_Fig_S1.pdf]

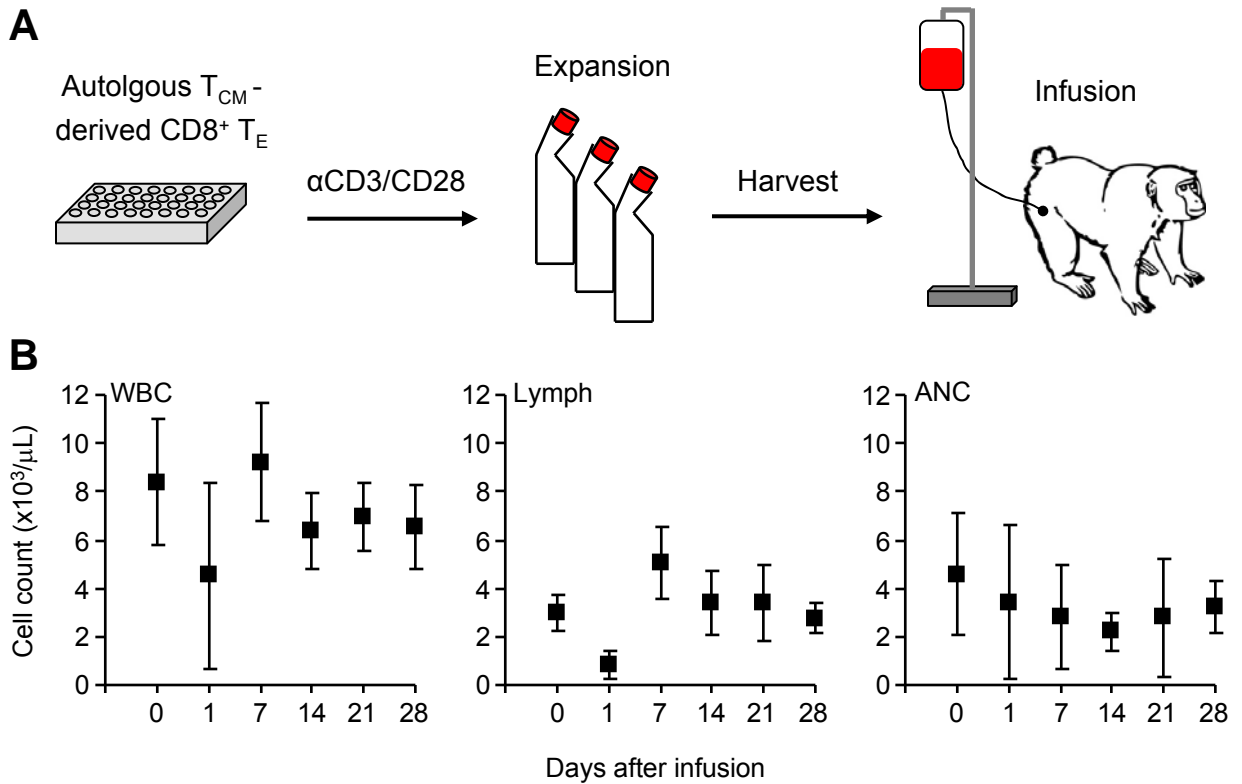

**Supplementary Figure 1. Schematic overview of the adoptive transfer of antigen-specific T cells in the macaque model.** (A) Strategy for expansion and transfer of autologous  $T_{CM}^-$  derived  $T_E$ . Aliquots of CMV-specific  $T_{CM}^-$  derived T cell clones were expanded in multiple tissue culture flasks as described in the Methods section. After 12-14 days of *ex vivo* culture, T cells were harvested and transferred back to the animal by intravenous infusion. (B) Absolute numbers of white blood cell counts (WBC), lymphocyte counts (Lymph), and absolute neutrophil counts (ANC) in peripheral blood before and after the  $T_E$  infusion. The absolute cell numbers were determined from CBC performed on the indicated days. Shown are the results (mean  $\pm$  SD) from four infusions of CMV-specific  $T_{CM}^-$  derived  $CD8^+$   $T_E$ .
